# Supplementary material
Source: PubMed Central journal article supplement (PMC2494512)

Supplemental Figure 1.

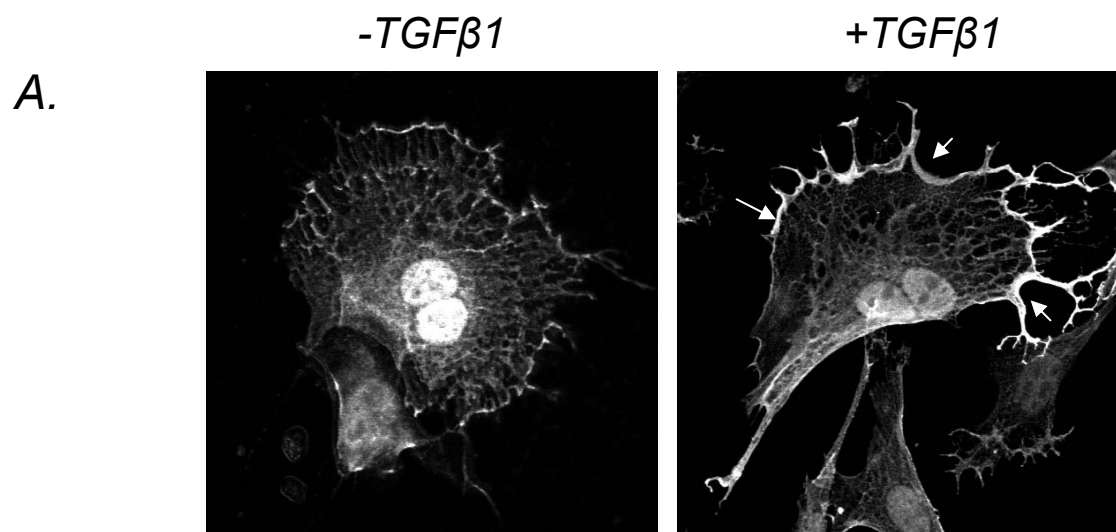

B.

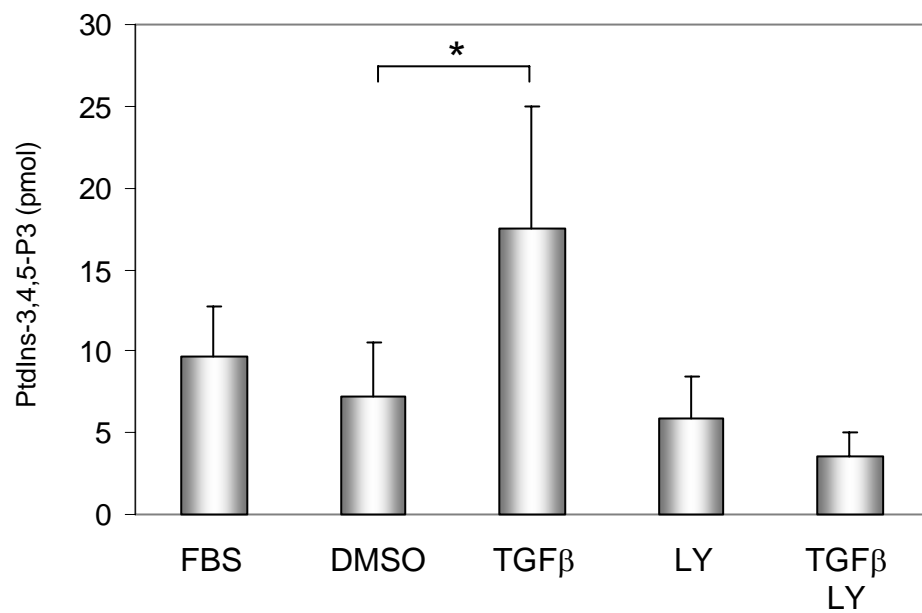

Supplement: 00548.2007_1.pdf [file 00548.2007_1.pdf]
